# Supplementary material for: Chlamydomonas reinhardtii tubulin-gene disruptants for efficient isolation of strains bearing tubulin mutations
Source: PubMed Central journal article supplement (PMC7682851; doi:10.1371/journal.pone.0242694), 2020-11-23
Supplement: pone.0242694.s001.pdf [file pone.0242694.s001.pdf]

1

2

3 ***Chlamydomonas reinhardtii* Tubulin-Gene Disruptants for Efficient Isolation of**  
4 **Strains Bearing Novel Tubulin Mutations**

5

6 **Takako Kato-Minoura<sup>1,2\*</sup>, Yutaro Ogiwara<sup>2</sup>, Takashi Yamano<sup>3</sup>, Hideya Fukuzawa<sup>3</sup>,**  
7 **and Ritsu Kamiya<sup>1</sup>**

8

9

**10 S1 Appendix. Primers used in this study.**

- 11 PSI103-F2: 5'-TGTCCGTTTCGATCGCAGTCT-3'
- 12 RB02: 5'-GTCGACTTGGAGGATCTGGACGA-3'
- 13 3'-Tus1891g: 5'-GCCVKCSYCCTCGGCGGA-3'
- 14 3'-Tus1803g: 5'-ACCCTCSTCCATRCCCTCACCGA-3'
- 15 5'-Tus1082c: 5'-GGCCGCATGTTCGACCAAGGAGGT-3'
- 16 5'-Tus1596g: 5'-GTCGTACTTCGTCGAGTGG-3'
- 17 3'-TuA2-3254g: 5'-CCAATCTCATTCATGCACTTCCTGTTTGTC-3'
- 18 5'-Tub1-3175c: 5'-CGGCTATTTAGGCGAGCGGTCTA-3'
- 19 3'-Tub1-3683g: 5'-CTTATGGGATTGGTTCAGCGTTAAC-3'
- 20 5'-Tub2-3032c: 5'-CGTGACTGTGGCGGCCTTG-3'
- 21 3'-Tub2-3507g: 5'-GACAGCCTGGGACATCTAAGAACTTGG-3'
- 22 5'-ChlaTuA1\_long969: 5'-GAAGAACCGCATGAACCCAGTCC-3'
- 23 3'-TuA6260: 5'-TTAACAGGAAGCCGTCGGATAGC-3'
- 24 5'-Tua2-10g: 5'-GCCCCGATTGATTACGCTCAC-3'
- 25 3'-TuA2-3288g: 5'-GAATTACATTGTGTGGTTTTAACTGCAGGT-3'
- 26 5'-tub1-33c: 5'-GCTGCCAGGACCTTCATACG-3'
- 27 3'-tub1-1667c: 5'-TTGCGCCATTGCTATCACAC-3'
- 28 5'-EcoTuB2\_upper: 5'-GTCACACGGCCCTCGGTACAC-3'
- 29 3'-XhoTuB2\_lower: 5'-GCATCACCCCTTGACACCAACAC-3'
- 30 5'-Tua1-1947c: 5'-CAAGTGTAGTGCTTTGCTG-3'
- 31 3'-Tua1-2290c: 5'-GTGCATGACTCCCAGT-3'
- 32 5'-Tua2-2403: 5'-CCGAGCTAGCATGTGAGCGTGTC-3'

33 3'-Tua2-2952c: 5'-ACGGGAGTGCAGGCGCTG-3'

34 5'-Tubs1818g: 5'-AACAAACGTCAAGTCTTCCGTGTGC-3'

35

36

37 **S2 Appendix. Procedures for supplemental**  
38 **experiments.**

39

40 **Northern hybridization**

41 Tubulin mRNA expression in the disruptants was verified by northern hybridization  
42 analysis [1]. Total RNA was isolated using TRIzol Reagent (Thermo Fisher Scientific) in  
43 accordance with the manufacturer's instructions. To distinguish the mRNAs from the four  
44 tubulin genes, the 3'-UTR region of each tubulin gene was amplified from the wild-type  
45 genomic DNA using primers 5'-Tua1-1947c and 3'-Tua1-2290 (for *tua1*), 5'-Tua2-2403c  
46 and 3'-Tua2-2952c (for *tua2*), 5'-Tub1-3175c and 3'-Tub1-3683g (for *tub1*), and  
47 5'-Tub2-3032c and 3'-Tub2-3507g (for *tub2*) together with PCR DIG Labeling Mix  
48 (Sigma-Aldrich), and the amplified 3'-UTR regions were used as probes.

49

50 **Drug-resistance test by dilution series of the inoculum**

51 *C. reinhardtii* strains were grown in liquid TAP medium until the mid-log phase, and then  
52 diluted or concentrated to dilution series,  $5 \times 10^6$ ,  $5 \times 10^7$ ,  $5 \times 10^8$ , and  $5 \times 10^9$  cells/mL.  
53 Then, 3  $\mu$ L of culture was spotted on a TAP-agar plate containing propyzamide (0–20  $\mu$ M),  
54 oryzalin (0–20  $\mu$ M), or colchicine (0–4 mM) and cultured for a week at 26°C under 12-h  
55 light/12-h dark conditions. A wild-type strain (CC-125) and an oryzalin-resistant mutant  
56 (upA12) [2], or colchicine-resistant mutants (*col<sup>R</sup>4* and *col<sup>R</sup>15* [3]) were used as references.

57

58

### 59 **S3 Appendix. Supplementary references**

60

- 61 1. Kato-Minoura T, Hirono M, Kamiya R. *Chlamydomonas* inner-arm dynein  
62 mutant, *ida5*, has a mutation in an actin-encoding gene. *J Cell Biol.*  
63 1997;137(3):649–56.
- 64 2. James SW, Silflow CD, Stroom P, Lefebvre PA. A mutation in the  
65  $\alpha$ 1-tubulin gene of *Chlamydomonas reinhardtii* confers resistance to  
66 anti-microtubule herbicides. *J Cell Sci.* 1993:209–18.
- 67 3. Lee VD, Huang B. Missense mutations at lysine 350 in beta 2-tubulin  
68 confer altered sensitivity to microtubule inhibitors in *Chlamydomonas*. *Plant*  
69 *Cell.* 1990;2(11):1051–7. Epub 1990/11/01. doi: 10.1105/tpc.2.11.1051. PubMed  
70 PMID: 2152107; PubMed Central PMCID: PMCPMC159953.
- 71 4. Ma C, Li C, Ganesan L, Oak J, Tsai S, Sept D, et al. Mutations in  
72 alpha-tubulin confer dinitroaniline resistance at a cost to microtubule function.  
73 *Mol Biol Cell.* 2007;18(12):4711–20. Epub 2007/09/21. doi:  
74 10.1091/mbc.e07-04-0379. PubMed PMID: 17881728; PubMed Central PMCID:  
75 PMCPMC2096588.
- 76 5. Lyons-Abbott S, Sackett DL, Wloga D, Gaertig J, Morgan RE, Werbovetz  
77 KA, et al. alpha-Tubulin mutations alter oryzalin affinity and microtubule  
78 assembly properties to confer dinitroaniline resistance. *Eukaryot Cell.*  
79 2010;9(12):1825–34. Epub 2010/09/28. doi: 10.1128/EC.00140-10. PubMed  
80 PMID: 20870876; PubMed Central PMCID: PMCPMC3008275.
- 81 6. Ryan LA, Hoey E, Trudgett A, Fairweather I, Fuchs M, Robinson MW, et al.  
82 *Fasciola hepatica* expresses multiple alpha- and beta-tubulin isotypes. *Mol*  
83 *Biochem Parasitol.* 2008;159(1):73–8. Epub 2008/03/29. doi:  
84 10.1016/j.molbiopara.2008.02.001. PubMed PMID: 18372053; PubMed Central  
85 PMCID: PMCPMC3820024.
- 86 7. Morrissette NS, Mitra A, Sept D, Sibley LD. Dinitroanilines bind  
87 alpha-tubulin to disrupt microtubules. *Mol Biol Cell.* 2004;15(4):1960–8. Epub  
88 2004/01/27. doi: 10.1091/mbc.e03-07-0530. PubMed PMID: 14742718; PubMed  
89 Central PMCID: PMCPMC379290.

- 90 8. Yin S, Zeng C, Hari M, Cabral F. Paclitaxel resistance by random  
91 mutagenesis of alpha-tubulin. *Cytoskeleton* (Hoboken). 2013;70(12):849–62.  
92 Epub 2013/10/25. doi: 10.1002/cm.21154. PubMed PMID: 24155014.
- 93 9. De S, Tsimounis A, Chen X, Rotenberg SA. Phosphorylation of  
94 alpha-tubulin by protein kinase C stimulates microtubule dynamics in human  
95 breast cells. *Cytoskeleton* (Hoboken). 2014;71(4):257–72. Epub 2014/02/28. doi:  
96 10.1002/cm.21167. PubMed PMID: 24574051; PubMed Central PMCID:  
97 PMCPMC4113324.
- 98 10. Markovsky E, de Stanchina E, Itzkowitz A, Haimovitz-Friedman A,  
99 Rotenberg SA. Phosphorylation state of Ser(165) in alpha-tubulin is a toggle  
100 switch that controls proliferating human breast tumors. *Cell Signal*.  
101 2018;52:74–82. Epub 2018/09/04. doi: 10.1016/j.cellsig.2018.08.021. PubMed  
102 PMID: 30176291; PubMed Central PMCID: PMCPMC6765385.
- 103 11. Poruchynsky MS, Kim JH, Nogales E, Annable T, Loganzo F, Greenberger  
104 LM, et al. Tumor cells resistant to a microtubule-depolymerizing hemiasterlin  
105 analogue, HTI-286, have mutations in alpha- or beta-tubulin and increased  
106 microtubule stability. *Biochemistry*. 2004;43(44):13944–54. Epub 2004/11/03.  
107 doi: 10.1021/bi049300+. PubMed PMID: 15518543.
- 108 12. Richards KL, Anders KR, Nogales E, Schwartz K, Downing KH, Botstein D.  
109 Structure-function relationships in yeast tubulins. *Mol Biol Cell*.  
110 2000;11(5):1887–903. Epub 2000/05/04. doi: 10.1091/mbc.11.5.1887. PubMed  
111 PMID: 10793159; PubMed Central PMCID: PMCPMC14891.
- 112 13. Fromherz S, Giddings TH, Jr., Gomez-Ospina N, Dutcher SK. Mutations in  
113 alpha-tubulin promote basal body maturation and flagellar assembly in the  
114 absence of delta-tubulin. *J Cell Sci*. 2004;117(Pt 2):303–14. Epub 2003/12/17.  
115 doi: 10.1242/jcs.00859. PubMed PMID: 14676280.
- 116 14. Ishida T, Kaneko Y, Iwano M, Hashimoto T. Helical microtubule arrays in  
117 a collection of twisting tubulin mutants of *Arabidopsis thaliana*. *Proc Natl Acad*  
118 *Sci USA*. 2007;104(20):8544–9. Epub 2007/05/10. doi: 10.1073/pnas.0701224104.  
119 PubMed PMID: 17488810; PubMed Central PMCID: PMCPMC1895986.
- 120 15. Thitamadee S, Tuchihara K, Hashimoto T. Microtubule basis for  
121 left-handed helical growth in *Arabidopsis*. *Nature*. 2002;417(6885):193–6. Epub  
122 2002/05/10. doi: 10.1038/417193a. PubMed PMID: 12000963.

- 123 16. Zou G, Ying SH, Shen ZC, Feng MG. Multi-sited mutations of beta-tubulin  
124 are involved in benzimidazole resistance and thermotolerance of fungal  
125 biocontrol agent *Beauveria bassiana*. Environ Microbiol. 2006;8(12):2096–105.  
126 Epub 2006/11/17. doi: 10.1111/j.1462-2920.2006.01086.x. PubMed PMID:  
127 17107551.
- 128 17. Robinson MW, McFerran N, Trudgett A, Hoey L, Fairweather I. A possible  
129 model of benzimidazole binding to beta-tubulin disclosed by invoking an  
130 inter-domain movement. J Mol Graph Model. 2004;23(3):275–84. Epub  
131 2004/11/09. doi: 10.1016/j.jmglm.2004.08.001. PubMed PMID: 15530823.
- 132 18. Ghisi M, Kaminsky R, Maser P. Phenotyping and genotyping of  
133 *Haemonchus contortus* isolates reveals a new putative candidate mutation for  
134 benzimidazole resistance in nematodes. Vet Parasitol. 2007;144(3-4):313–20.  
135 Epub 2006/11/15. doi: 10.1016/j.vetpar.2006.10.003. PubMed PMID: 17101226.
- 136 19. Park SY, Jung OJ, Chung YR, Lee CW. Isolation and characterization of a  
137 benomyl-resistant form of beta-tubulin-encoding gene from the  
138 phytopathogenic fungus *Botryotinia fuckeliana*. Mol Cells. 1997;7(1):104–9.  
139 Epub 1997/02/28. PubMed PMID: 9085273.
- 140 20. Ma Z, Yoshimura MA, Michailides TJ. Identification and characterization  
141 of benzimidazole resistance in *Monilinia fructicola* from stone fruit orchards in  
142 California. Appl Environ Microbiol. 2003;69(12):7145–52. Epub 2003/12/09. doi:  
143 10.1128/aem.69.12.7145-7152.2003. PubMed PMID: 14660360; PubMed  
144 Central PMCID: PMC309941.
- 145 21. Luo Y, Ma Z, Michailides TJ. Quantification of allele E198A in beta-tubulin  
146 conferring benzimidazole resistance in *Monilinia fructicola* using real-time  
147 PCR. Pest Manag Sci. 2007;63(12):1178–84. Epub 2007/10/04. doi:  
148 10.1002/ps.1425. PubMed PMID: 17912681.
- 149 22. McKay GJ, Cooke LR. A PCR-based method to characterise and identify  
150 benzimidazole resistance in *Helminthosporium solani*. FEMS Microbiol Lett.  
151 1997;152(2):371–8. Epub 1997/07/15. doi: 10.1111/j.1574-6968.1997.tb10454.x.  
152 PubMed PMID: 9231430.
- 153 23. Yang Y, Li MX, Duan YB, Li T, Shi YY, Zhao DL, et al. A new point  
154 mutation in beta2-tubulin confers resistance to carbendazim in *Fusarium*  
155 *asiaticum*. Pestic Biochem Physiol. 2018;145:15–21. Epub 2018/02/28. doi:

- 156 10.1016/j.pestbp.2017.12.006. PubMed PMID: 29482727.
- 157 24. Vela-Corcía D, Romero D, de Vicente A, Pérez-García A. Analysis of  
158 beta-tubulin-carbendazim interaction reveals that binding site for MBC  
159 fungicides does not include residues involved in fungicide resistance. *Sci Rep.*  
160 2018;8(1):7161. Epub 2018/05/10. doi: 10.1038/s41598-018-25336-5. PubMed  
161 PMID: 29740047; PubMed Central PMCID: PMC5940828.
- 162 25. Reijo RA, Cooper EM, Beagle GJ, Huffaker TC. Systematic mutational  
163 analysis of the yeast beta-tubulin gene. *Mol Biol Cell.* 1994;5(1):29–43. Epub  
164 1994/01/01. doi: 10.1091/mbc.5.1.29. PubMed PMID: 8186463; PubMed Central  
165 PMCID: PMC301007.
- 166 26. Jung MK, Wilder IB, Oakley BR. Amino acid alterations in the benA  
167 (beta-tubulin) gene of *Aspergillus nidulans* that confer benomyl resistance. *Cell*  
168 *Motil Cytoskel.* 1992;22(3):170–4. Epub 1992/01/01. doi: 10.1002/cm.970220304.  
169 PubMed PMID: 1423663.
- 170 27. Ziogas BN, Nikou D, Markoglou AN, Malandrakis AA, Vontas J.  
171 Identification of a novel point mutation in the  $\beta$ -tubulin gene of *Botrytis cinerea*  
172 and detection of benzimidazole resistance by a diagnostic PCR-RFLP assay.  
173 *European journal of plant pathology.* 2009;125(1):97–107.
- 174 28. Fujimura M, Oeda K, Inoue H, Kato T. A single amino-acid substitution in  
175 the beta-tubulin gene of *Neurospora* confers both carbendazim resistance and  
176 diethofencarb sensitivity. *Curr Genet.* 1992;21(4-5):399–404. Epub 1992/04/01.  
177 doi: 10.1007/bf00351701. PubMed PMID: 1388107.
- 178 29. Wiesen KM, Xia S, Yang CP, Horwitz SB. Wild-type class I beta-tubulin  
179 sensitizes taxol-resistant breast adenocarcinoma cells harboring a beta-tubulin  
180 mutation. *Cancer Lett.* 2007;257(2):227–35. Epub 2007/09/18. doi:  
181 10.1016/j.canlet.2007.07.022. PubMed PMID: 17869412.
- 182 30. Cai M, Lin D, Chen L, Bi Y, Xiao L, Liu XL. M233I mutation in the  
183 beta-tubulin of *Botrytis cinerea* confers resistance to zoxamide. *Sci Rep.*  
184 2015;5:16881. Epub 2015/11/26. doi: 10.1038/srep16881. PubMed PMID:  
185 26596626; PubMed Central PMCID: PMC4657022.
- 186 31. Wright AJ, Hunter CP. Mutations in a beta-tubulin disrupt spindle  
187 orientation and microtubule dynamics in the early *Caenorhabditis elegans*  
188 embryo. *Mol Biol Cell.* 2003;14(11):4512–25. Epub 2003/08/26. doi:



- 189 10.1091/mbc.e03-01-0017. PubMed PMID: 12937270; PubMed Central PMCID:  
190 PMCPMC268303.
- 191 32. Buhr TL, Dickman MB. Isolation, characterization, and expression of a  
192 second beta-tubulin-encoding gene from *Colletotrichum gloeosporioides* f. sp.  
193 aeshynomene. Appl Environ Microbiol. 1994;60(11):4155–9. Epub 1994/11/01.  
194 PubMed PMID: 7993097; PubMed Central PMCID: PMCPMC201950.
- 195 33. Fujimura M, Kamakura T, Inoue H, Yamaguchi I. Amino-acid alterations  
196 in the beta-tubulin gene of *Neurospora crassa* that confer resistance to  
197 carbendazim and diethofencarb. Curr Genet. 1994;25(5):418–22. Epub  
198 1994/05/01. doi: 10.1007/bf00351780. PubMed PMID: 8082187.
- 199 34. Chen CJ, Yu JJ, Bi CW, Zhang YN, Xu JQ, Wang JX, et al. Mutations in a  
200 beta-tubulin confer resistance of *Gibberella zeae* to benzimidazole fungicides.  
201 Phytopathology. 2009;99(12):1403–11. Epub 2009/11/11. doi:  
202 10.1094/PHYTO-99-12-1403. PubMed PMID: 19900007.
- 203 35. Liu X, Yin Y, Wu J, Jiang J, Ma Z. Identification and characterization of  
204 carbendazim-resistant isolates of *Gibberella zeae*. Plant Dis. 2010;94(9):1137–  
205 42. Epub 2010/09/01. doi: 10.1094/PDIS-94-9-1137. PubMed PMID: 30743730.
- 206 36. Escuin D, Burke PA, McMahan-Tobin G, Hembrough T, Wang Y, Alcaraz  
207 AA, et al. The hematopoietic-specific beta1-tubulin is naturally resistant to  
208 2-methoxyestradiol and protects patients from drug-induced myelosuppression.  
209 Cell Cycle. 2009;8(23):3914–24. Epub 2009/11/11. doi: 10.4161/cc.8.23.10105.  
210 PubMed PMID: 19901556.
- 211 37. Schibler MJ, Huang B. The *colR4* and *colR15* beta-tubulin mutations in  
212 *Chlamydomonas reinhardtii* confer altered sensitivities to microtubule  
213 inhibitors and herbicides by enhancing microtubule stability. J Cell Biol.  
214 1991;113(3):605–14. Epub 1991/05/01. doi: 10.1083/jcb.113.3.605. PubMed  
215 PMID: 1673126; PubMed Central PMCID: PMCPMC2288959.
- 216 38. Gaertig J, Thatcher TH, Gu L, Gorovsky MA. Electroporation-mediated  
217 replacement of a positively and negatively selectable beta-tubulin gene in  
218 *Tetrahymena thermophila*. Proc Natl Acad Sci USA. 1994;91(10):4549–53.  
219 Epub 1994/05/10. doi: 10.1073/pnas.91.10.4549. PubMed PMID: 7910408;  
220 PubMed Central PMCID: PMCPMC43823.
- 221 39. Gaertig J, Gao Y, Tishgarten T, Clark TG, Dickerson HW. Surface display

- 222 of a parasite antigen in the ciliate *Tetrahymena thermophila*. Nat Biotechnol.  
223 1999;17(5):462–5. Epub 1999/05/20. doi: 10.1038/8638. PubMed PMID:  
224 10331805.
- 225 40. Smith JJ, Yakisich JS, Kapler GM, Cole ES, Romero DP. A beta-tubulin  
226 mutation selectively uncouples nuclear division and cytokinesis in  
227 *Tetrahymena thermophila*. Eukaryot Cell. 2004;3(5):1217–26. Epub 2004/10/08.  
228 doi: 10.1128/EC.3.5.1217-1226.2004. PubMed PMID: 15470250; PubMed  
229 Central PMCID: PMCPMC522614.
- 230 41. Hari M, Wang Y, Veeraraghavan S, Cabral F. Mutations in alpha- and  
231 beta-tubulin that stabilize microtubules and confer resistance to colcemid and  
232 vinblastine. Mol Cancer Ther. 2003;2(7):597–605. Epub 2003/07/29. PubMed  
233 PMID: 12883031.
- 234 42. Hua XH, Genini D, Gussio R, Tawatao R, Shih H, Kipps TJ, et al.  
235 Biochemical genetic analysis of indanocine resistance in human leukemia.  
236 Cancer Res. 2001;61(19):7248–54. Epub 2001/10/05. PubMed PMID: 11585762.
- 237 43. Gokmen-Polar Y, Escuin D, Walls CD, Soule SE, Wang Y, Sanders KL, et  
238 al. beta-tubulin mutations are associated with resistance to 2-methoxyestradiol  
239 in MDA-MB-435 cancer cells. Cancer Res. 2005;65(20):9406–14. Epub  
240 2005/10/19. doi: 10.1158/0008-5472.CAN-05-0088. PubMed PMID: 16230404.
- 241 44. de Lourdes Mottier M, Prichard RK. Genetic analysis of a relationship  
242 between macrocyclic lactone and benzimidazole anthelmintic selection on  
243 *Haemonchus contortus*. Pharmacogenet Genomics. 2008;18(2):129–40. Epub  
244 2008/01/15. doi: 10.1097/FPC.0b013e3282f4711d. PubMed PMID: 18192899.
- 245 45. Ruiz F, Dupuis-Williams P, Klotz C, Forquignon F, Bergdoll M, Beisson J,  
246 et al. Genetic evidence for interaction between eta- and beta-tubulins. Eukaryot  
247 Cell. 2004;3(1):212–20. Epub 2004/02/12. doi: 10.1128/ec.3.1.212-220.2004.  
248 PubMed PMID: 14871951; PubMed Central PMCID: PMCPMC329518.
- 249 46. Jung MK, Oakley BR. Identification of an amino acid substitution in the  
250 benA, beta-tubulin gene of *Aspergillus nidulans* that confers thiabendazole  
251 resistance and benomyl supersensitivity. Cell Motil Cytoskel. 1990;17(2):87–94.  
252 Epub 1990/01/01. doi: 10.1002/cm.970170204. PubMed PMID: 2257633.
- 253 47. de Lourdes Mottier M, Prichard RK. Genetic analysis of a relationship  
254 between macrocyclic lactone and benzimidazole anthelmintic selection on

255 *Haemonchus contortus*. Pharmacogenetics and genomics. 2008;18(2):129–40.

256

257
