# Supplementary material for: Chlamydomonas reinhardtii tubulin-gene disruptants for efficient isolation of strains bearing tubulin mutations
Source: PubMed Central journal article supplement (PMC7682851; doi:10.1371/journal.pone.0242694), 2020-11-23

(a) *tua1* mRNA

wild type

*tua1*-A

*tua2*-A

*tua2*-B

*tua2*-C

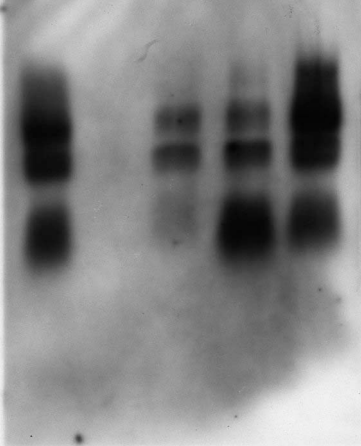

メチレンブルー

WT #30 #52 #65

*tua1*

WT #30 #52 #65

*tua2*

WT #30 #52 #65

28S rRNA ★  
18S rRNA ★

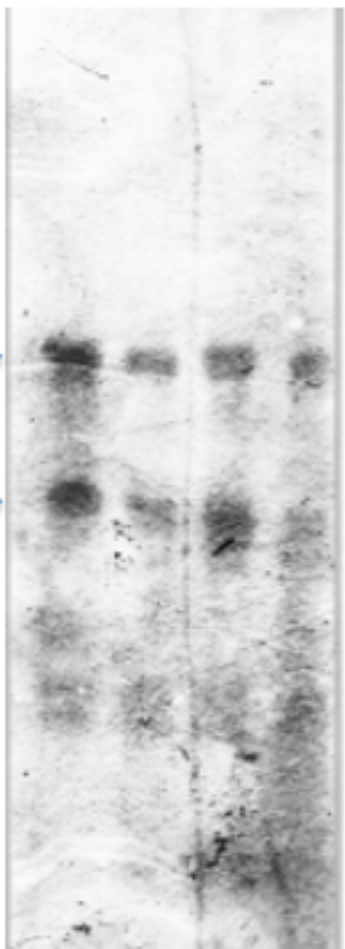

(b) *tua2* mRNA  
wild type *tua2-C* *tua2-B* *tua2-A*

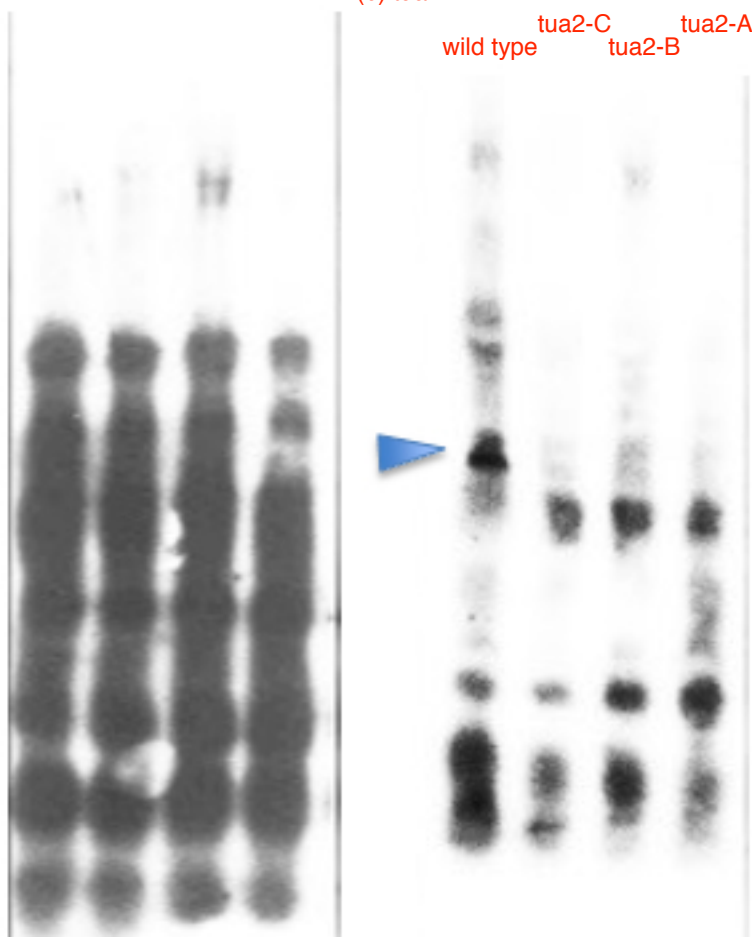

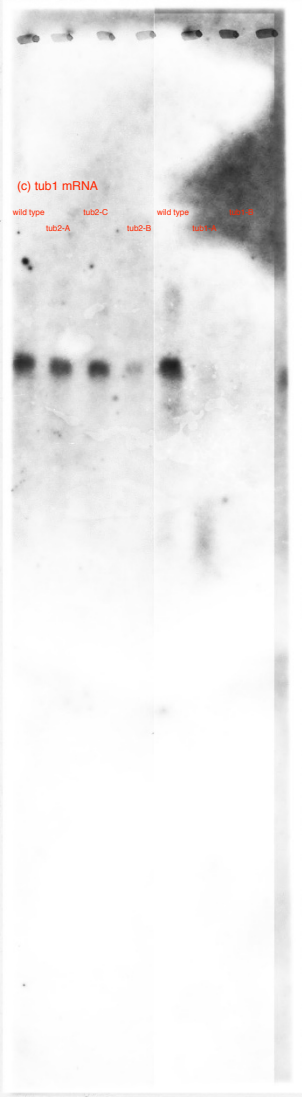

③

B1

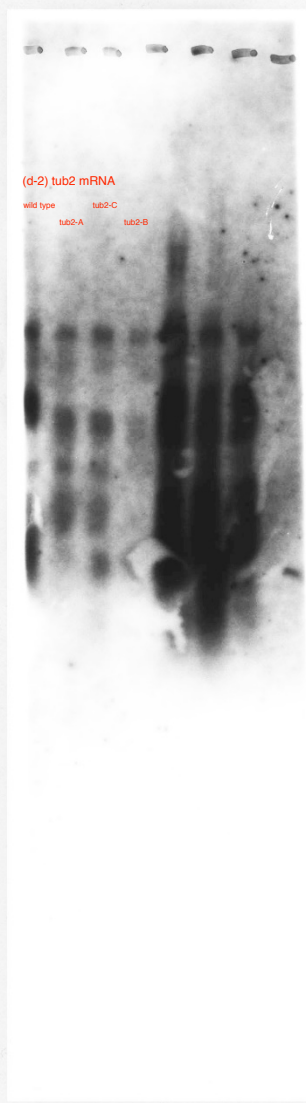

④

B2

(d-1) tub2 mRNA

wild type

tub1-B

tub1-A

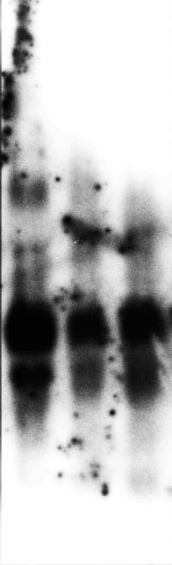

Supplement: pone.0242694.s010.pdf [file pone.0242694.s010.pdf]
