# Supplementary material for: Chlamydomonas reinhardtii tubulin-gene disruptants for efficient isolation of strains bearing tubulin mutations
Source: PubMed Central journal article supplement (PMC7682851; doi:10.1371/journal.pone.0242694), 2020-11-23

wild type (x5)

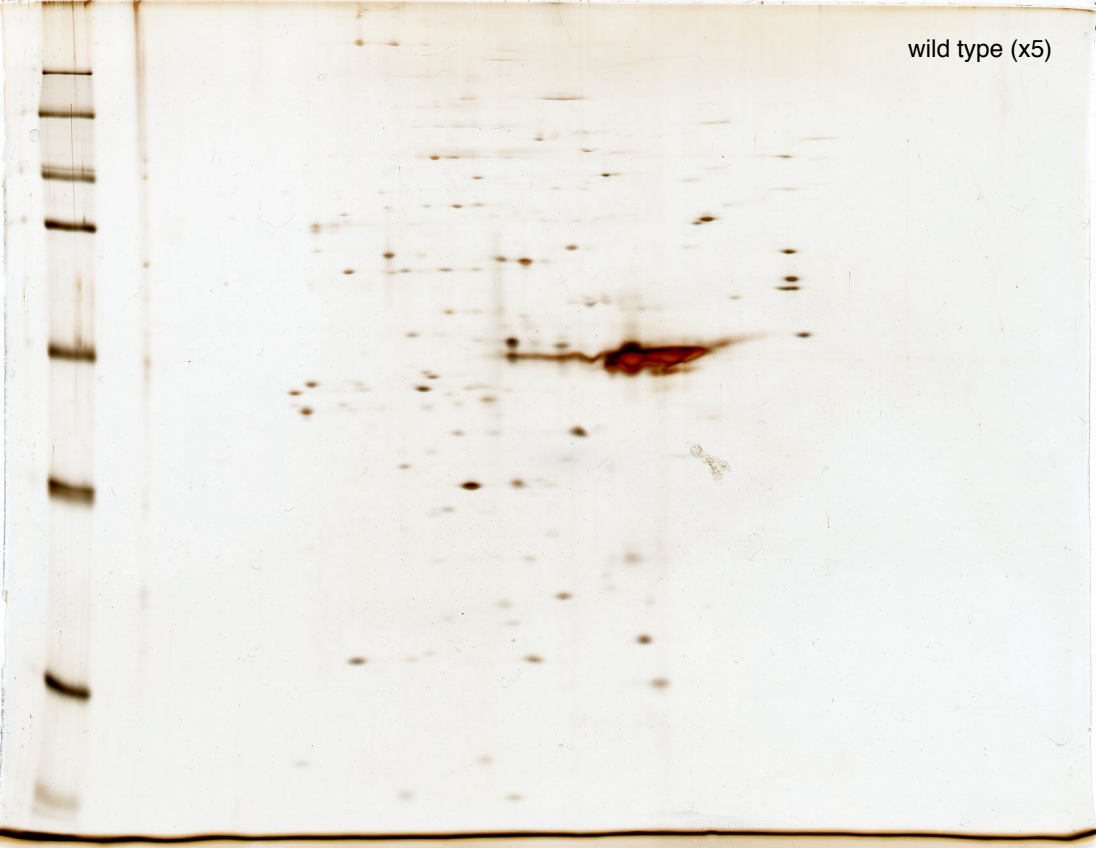

wild type

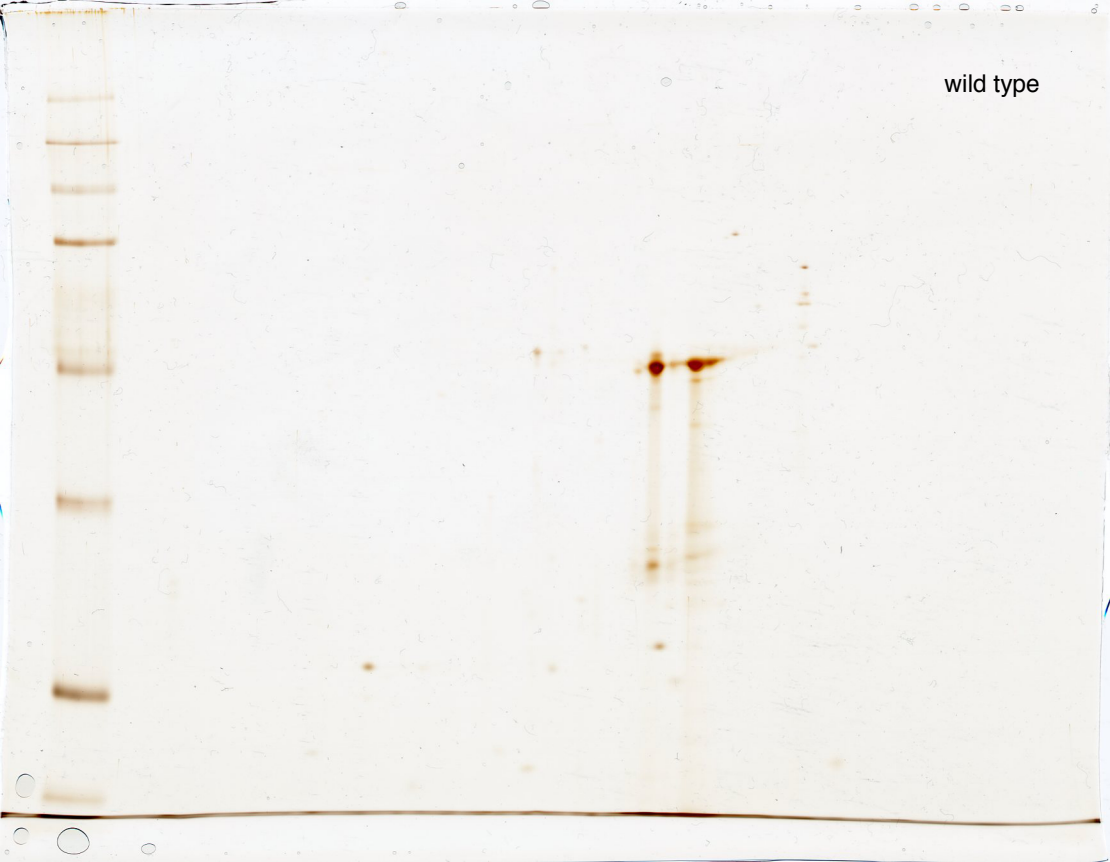

pyz2

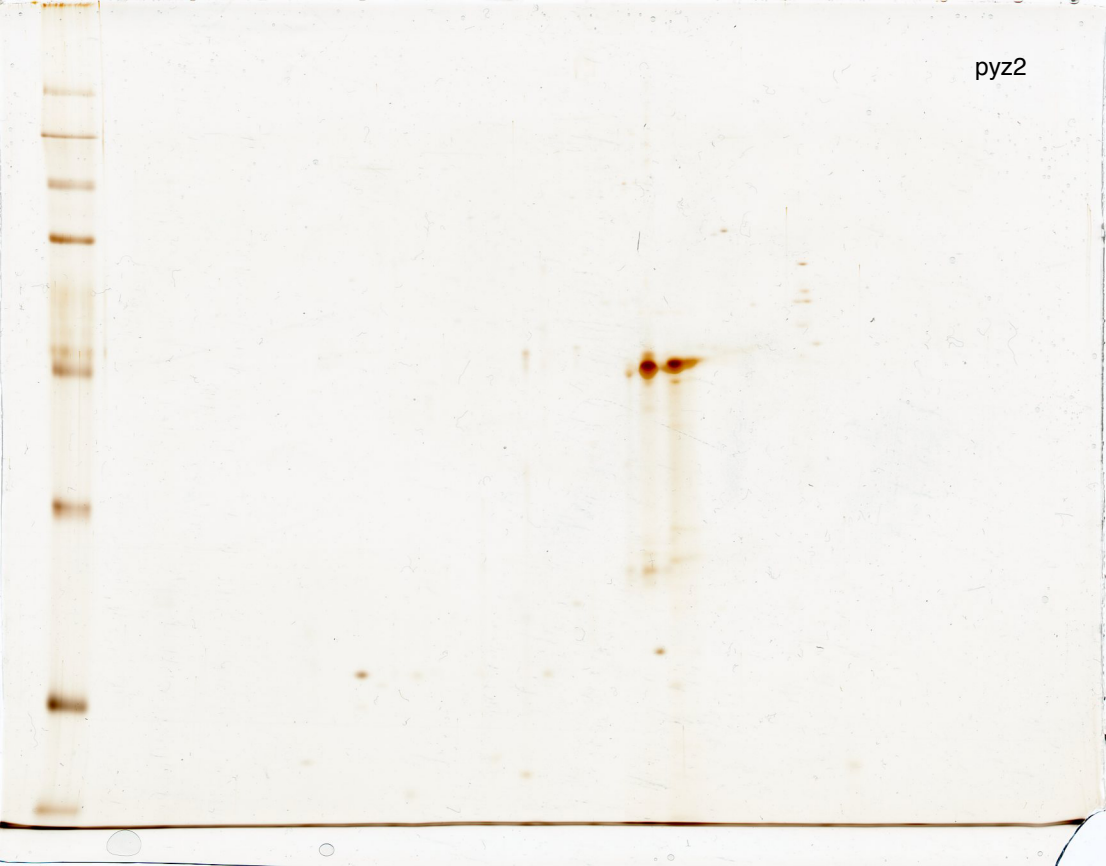

pyz10

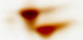

Supplement: pone.0242694.s012.pdf [file pone.0242694.s012.pdf]
